# Supplementary material for: Assessing the Impact of Transgenerational Epigenetic Variation on Complex Traits
Source: PubMed Central journal article supplement (PMC2696037; doi:10.1371/journal.pgen.1000530), 2009-06-26

**A**

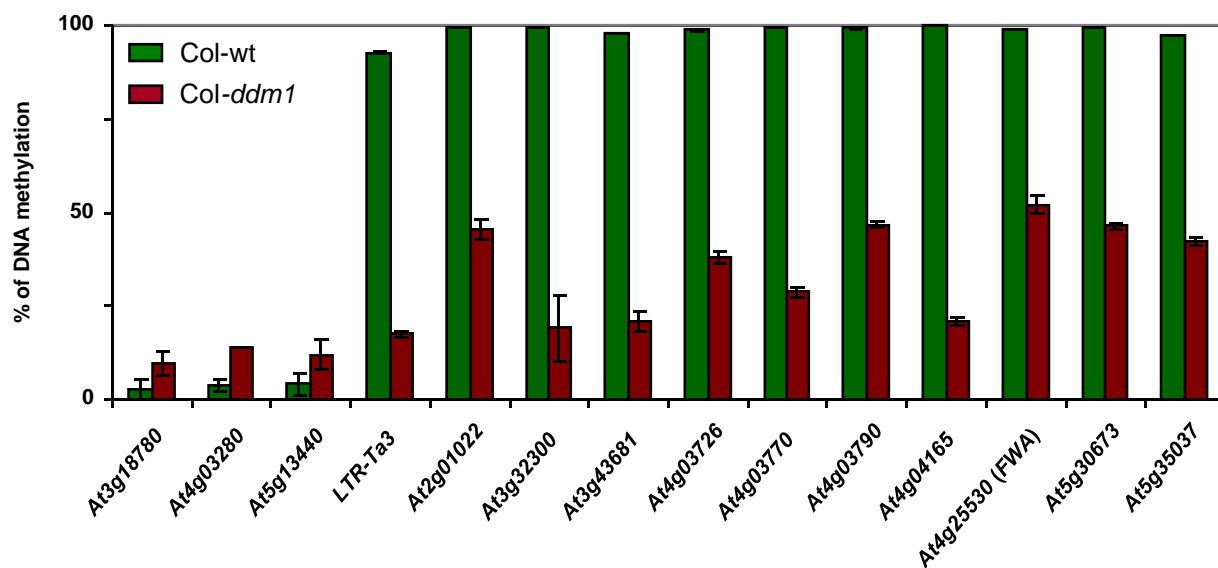

**B**

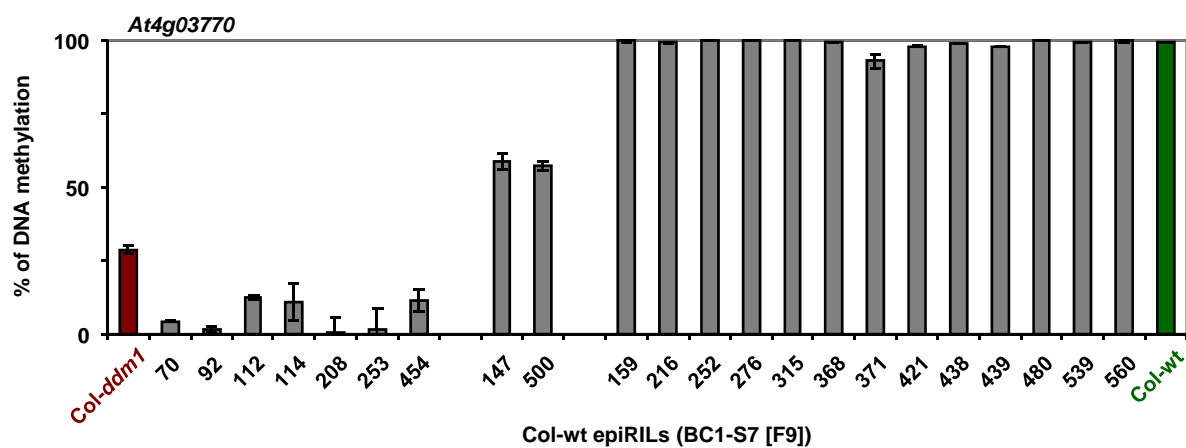

**C**

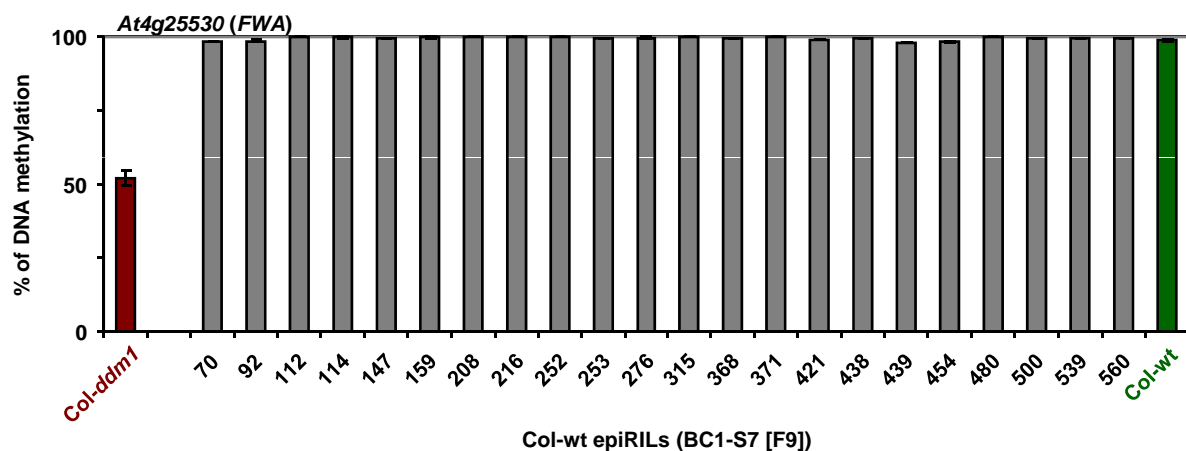

Supplement: pgen.1000530.s001.pdf [file pgen.1000530.s001.pdf]
