# Supplementary material for: Assessing the Impact of Transgenerational Epigenetic Variation on Complex Traits
Source: PubMed Central journal article supplement (PMC2696037; doi:10.1371/journal.pgen.1000530), 2009-06-26
Supplement: pgen.1000530.s003.pdf [file pgen.1000530.s003.pdf]

**Table S2:** Estimated population means and variances

| Phenotype                       | Sample           | Sample Size | Mean  | 95 % Cofidence Interval |       | Variance | 95 % Cofidence Interval |       |
|---------------------------------|------------------|-------------|-------|-------------------------|-------|----------|-------------------------|-------|
|                                 |                  |             |       | lower                   | upper |          | lower                   | upper |
| <i>Flowering time</i><br>(days) | Col- <i>ddm1</i> | 200         | 35.30 | 34.93                   | 35.70 | 8.39     | 6.41                    | 10.56 |
|                                 | Col-wt           | 199         | 36.34 | 35.97                   | 36.72 | 6.93     | 5.96                    | 7.83  |
|                                 | Col-wt control   | 144         | 39.50 | 38.92                   | 40.06 | 8.39     | 6.45                    | 10.28 |
|                                 | Col-wt epiRIL    | 3013        | 37.99 | 37.79                   | 38.21 | 11.18    | 9.37                    | 13.11 |
| <i>Plant height</i><br>(cm)     | Col- <i>ddm1</i> | 196         | 38.56 | 37.79                   | 39.28 | 30.62    | 23.66                   | 37.50 |
|                                 | Col-wt           | 196         | 48.40 | 47.87                   | 48.95 | 15.78    | 11.56                   | 20.26 |
|                                 | Col-wt control   | 140         | 48.40 | 47.21                   | 49.47 | 22.49    | 11.84                   | 35.75 |
|                                 | Col-wt epiRIL    | 2969        | 47.84 | 47.43                   | 48.20 | 35.53    | 29.66                   | 43.16 |

Table S2 provides the numerical results for the estimated population means and variances for flowering time and plants height. The 95% confidence intervals were obtained as described in the Text S1. The results for the Col-wt control population are also included for comparison.
