# Supplementary material for: Assessing the Impact of Transgenerational Epigenetic Variation on Complex Traits
Source: PubMed Central journal article supplement (PMC2696037; doi:10.1371/journal.pgen.1000530), 2009-06-26
Supplement: pgen.1000530.s006.pdf [file pgen.1000530.s006.pdf]

**Table S5:** Linear mixed model results

| Phenotype             | Model ( <i>N</i> ) | Variable | % variance | 95% Confidence Interval |       | Chi-square | <i>P</i> -value |
|-----------------------|--------------------|----------|------------|-------------------------|-------|------------|-----------------|
|                       |                    |          |            | lower                   | upper |            |                 |
| <i>Flowering time</i> | 2856               | G        | 39.61      | 39.56                   | 40.01 | 2289.2     | < 0.0001        |
|                       |                    | M        | 4.12       | 3.29                    | 5.05  | 325.91     | < 0.0001        |
|                       |                    | L        | 26.41      | 22.92                   | 31.25 | 1417.8     | < 0.0001        |
|                       |                    | S        | 6.49       | 4.74                    | 8.78  | 47.104     | < 0.0001        |
| <i>Plant height</i>   | 2813               | G        | 2.45       | 2.45                    | 2.95  | 104.92     | < 0.0001        |
|                       |                    | M        | 0.086      | 0.0000013               | 0.379 | 3.01       | 0.051           |
|                       |                    | L        | 31.88      | 26.72                   | 37.86 | 470.99     | < 0.0001        |
|                       |                    | S        | 3.49       | 0.54                    | 7.09  | 2.97       | 0.053           |

Table S5 shows the complete numeric results from the linear mixed model analysis. Model (*N*) = Effective sample size; G = Greenhouse, M = Micro-environment variable (see Supplementary Methods); L = Line; S = Subline; % variance = Percent of the variance accounted for by the variable; Chi-square values and the corresponding *p*-values were obtained from hypothesis tests using the likelihood ratio statistic. For each phenotype, outliers  $> \pm 3$  standard deviations from the mean were removed from the analyses.
