# Supplementary material for: Assessing the Impact of Transgenerational Epigenetic Variation on Complex Traits
Source: PLOS journal article supplement (doi:10.1371/journal.pgen.1000530), 2009-06-25
Supplement: S4 (10.1371/journal.pgen.1000530.s004) [file journal.pgen.1000530.s004]

**Table S3:** Means comparison

| Phenotype                       | Sample 1         | Sample 2         | Larger obs. mean | $t$   | 95 % Confidence Interval |       | $p$ -value |
|---------------------------------|------------------|------------------|------------------|-------|--------------------------|-------|------------|
|                                 |                  |                  |                  |       | lower                    | upper |            |
| <i>Flowering time</i><br>(days) | Col-wt epiRIL    | Col- <i>ddm1</i> | Col-wt epiRIL    | 12.73 | 10.27                    | 15.26 | < 0.0001   |
|                                 | Col-wt epiRIL    | Col-wt           | Col-wt epiRIL    | 8.49  | 6.32                     | 10.85 | < 0.0001   |
|                                 | Col-wt epiRIL    | Col-wt control   | Col-wt control   | 6.36  | 3.83                     | 9.29  | < 0.0001   |
|                                 | Col- <i>ddm1</i> | Col-wt           | Col-wt           | 3.81  | 2.07                     | 5.26  | 0.0002     |
|                                 | Col- <i>ddm1</i> | Col-wt control   | Col-wt control   | 13.54 | 11.43                    | 16.04 | < 0.0001   |
|                                 | Col-wt           | Col-wt control   | Col-wt control   | 10.42 | 8.13                     | 12.98 | < 0.0001   |
| <i>Plant height</i><br>(cm)     | Col-wt epiRIL    | Col- <i>ddm1</i> | Col-wt epiRIL    | 22.59 | 19.81                    | 25.57 | < 0.0001   |
|                                 | Col-wt epiRIL    | Col-wt           | Col-wt           | 1.83  | 0.07                     | 3.62  | 0.07       |
|                                 | Col-wt epiRIL    | Col-wt control   | Col-wt control   | 1.92  | 0.19                     | 5.25  | 0.18       |
|                                 | Col- <i>ddm1</i> | Col-wt           | Col-wt           | 20.36 | 17.26                    | 23.03 | < 0.0001   |
|                                 | Col- <i>ddm1</i> | Col-wt control   | Col-wt control   | 17.67 | 13.77                    | 21.67 | < 0.0001   |
|                                 | Col-wt           | Col-wt control   | Col-wt           | 0.95  | 0.03                     | 3.01  | 0.99       |

Table S3 provides the comparisons of the phenotypic means between selected sample pairs. The bootstrapped  $t$ -statistic, 95 % confidence intervals, and the corresponding  $p$ -values were obtained as described in the text. In each case, the sample with larger observed mean is indicated in column four.
